# Supplementary material for: Affinity-optimizing enhancer variants disrupt development
Source: PubMed Central journal article supplement (PMC10830414; doi:10.1038/s41586-023-06922-8), 2024-01-17

---

**Supplementary information**

---

**Affinity-optimizing enhancer variants  
disrupt development**

---

In the format provided by the  
authors and unedited

# Supplementary Information Figure 1

**A** ETS-1 binding to ETS-A site in ZRS  
(Extended Data Figure 4A)

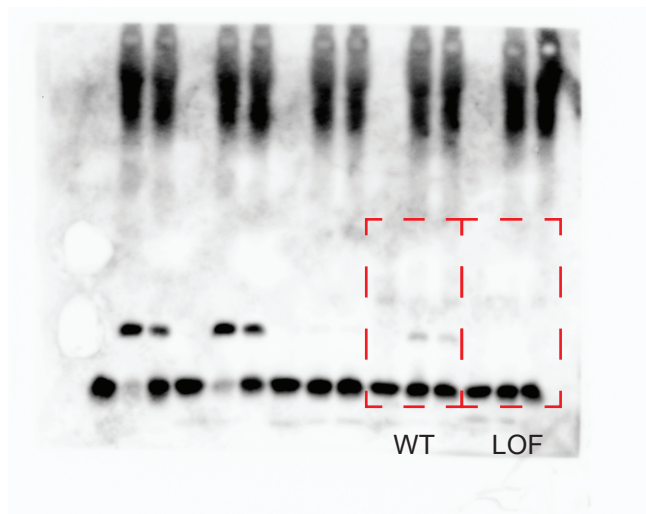

**B** ETS-1 binding to ETS-A site in ZRS  
(Extended Data Figure 4B)

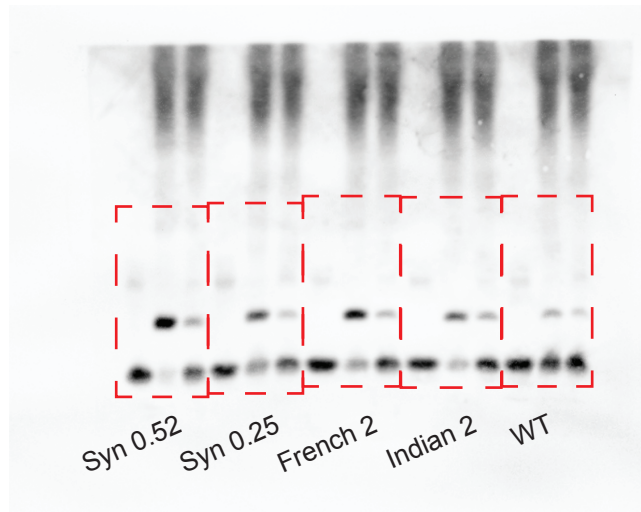

**C** HOXA13 binding to Dutch 2 variant in ZRS  
(Extended Data Figure 8A)

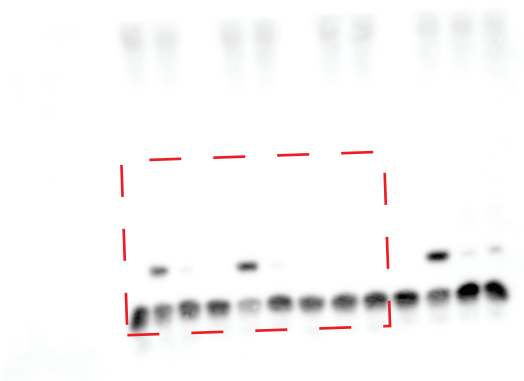

**D** HOXD13 binding to Dutch 2 variant in ZRS  
(Extended Data Figure 8B)

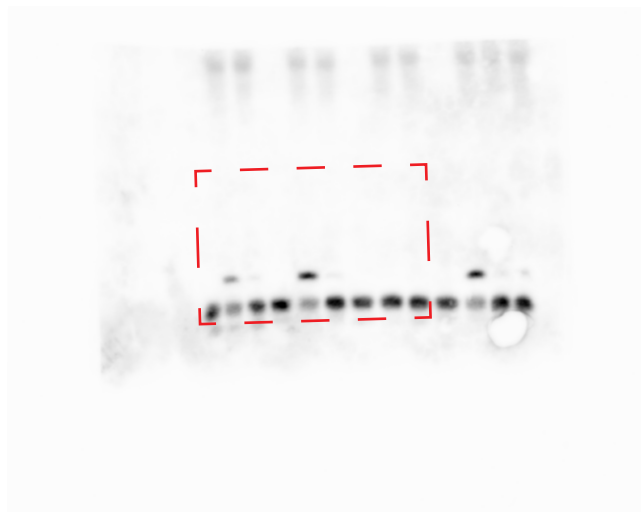

Supplement: 41586_2023_6922_MOESM1_ESM.pdf [file 41586_2023_6922_MOESM1_ESM.pdf]
